# Supplementary material
Source: publisher figshare collection journal article supplement (https://gsajournals.figshare.com/ndownloader/files/12749900)
Supplement: Supplementary file 1 [file 12749900]

**Table S1. Strains used in the current study and their genotypes.**

| **Strain name** | **Parental strain** | **Genotype** | **Reference** |
| --- | --- | --- | --- |
| SC5314 |  | Clinical strain | (Maestrone and Semar 1968) |
| CAI4 | SC5314 | *ura3::imm434/ura3::imm434 iro1/iro1::imm434* | (Fonzi and Irwin 1993) |
| SN148 | SC5314 | *arg4/arg4 leu2/leu2 his1/his1 ura3::1 imm434/ura3::1 imm434* | (Noble and Johnson 2005) |
| SN95 | SC5314 | *ura3::imm434::URA3/ura3 iro1 IRO1/iro1 his1/his1 arg4/arg4* | (Noble and Johnson 2005) |
| SN250 | SN152 | *his1/his1, leu2:: HIS1 /leu2:: LEU2,*  *arg4 /arg4, URA3/ura3::imm434, IRO1/iro1::imm434* | (Noble *et al.* 2010) |
| SFY87 | SC5314 | *ura3::λ imm434/ura3::λ imm434 his1::hisG/his1::hisG arg4::hisG/arg4::hisG RPS1/rps1::[CIp30]* | (Vandeputte *et al.* 2012) |
| CAS4 | CAI4 | *ura3::imm434/ura3::imm434 iro1/iro1::imm434 sch9::hisG/sch9::hisG* | (Stichternoth *et al.* 2011) |
| JC378 | SN95 | *ura3::imm434::URA3/ura3iro1 IRO1/iro1 his1/his1 arg4/arg4 dot6::HIS1 DOT6-GFP::ARG4* | This study |
| DSY4169-B | BWP17 | *ura3::imm434/ura3::imm434 iro1/iro1::imm434 his1::hisG/his1::hisG arg4/arg4 dot6::URA3 dot6::ARG4* | (Vandeputte *et al.* 2012) |
| DSY3452-15 | BWP17 | *ura3::imm434/ura3::imm434 iro1/iro1::imm434 his1::hisG/his1::hisG arg4/arg4 sfp1::URA3 sfp1::ARG4* | (Vandeputte *et al.* 2012) |
| *hog1* | SN152 | *arg4/arg4 leu2/leu2 his1/his1 ura3::imm434/ura3::imm434 iro1::imm434/iro1::imm434 hog1::His3 hog1::Leu2* | (Noble *et al.* 2010) |
| *swi4* | SN152 | *ura3/::imm434::URA3/ura3::imm434 iro1::IRO1/iro1::imm434 his1::hisG/his1::hisG leu2/leu2 arg4/arg4 swi4::Leu2 swi4::His3* | (Noble *et al.* 2010) |
| JC414 (*dot6* revertant) | DSY4169-B | *ura3::imm434/ura3::imm434 iro1/iro1::imm434 his1::hisG/his1::hisG arg4/arg4 dot6::ura3 dot6::ARG4 CIpAct1-DOT6-URA3* | This study |
| JC407 (*dot6 sfp1*) | DSY4169-B | *ura3::imm434/ura3::imm434 iro1/iro1::imm434 his1::hisG/his1::hisG arg4/arg4 dot6::URA3 dot6::ARG4 sfp1::HIS1 sfp1::SAT1* | This study |
| JC285 (*sch9 dot6*) | CAS4 | *ura3::imm434/ura3::imm434 iro1/iro1::imm434 sch9::hisG/sch9::hisG dot6::SAT1 dot6::URA3* | This study |
| JC389 (*dot6 swi4*) | DSY4169-B | *ura3::imm434/ura3::imm434 iro1/iro1::imm434 his1::hisG/his1::hisG arg4/arg4 dot6::URA3 dot6::ARG4 swi4::HIS1 swi4::SAT1* | This study |
| JC504 (*hog1 dot6*) | DSY4169-B | *ura3::imm434/ura3::imm434 iro1/iro1::imm434 his1::hisG/his1::hisG arg4/arg4 dot6::URA3 dot6::ARG4 hog1::HIS1 hog1::SAT1* | This study |
| JKC1345 (*TOR1*/*tor1*) | SN95 | *tor1::ARG4/TOR1 his1/his1::FRT-tetR arg4/arg4 URA3/ura3::λimm434 IRO1/iro1::λimm434* | (Chowdhury and Kohler 2015) |
| JC482 (*TOR1/tor1 DOT6/dot6*) | JKC1345 | *tor1::ARG4/TOR1 his1/his1::FRT-tetR arg4/arg4 URA3/ura3::λimm434 IRO1/iro1::λimm434 dot6::HIS1* | This study |
| JC390 (*DOT6*-Δ[1555-1803] | SC5314 | *DOT6-Δ[1555-1803]::SAT1* | This study |

**References**:

Chowdhury, T., and J. R. Kohler, 2015 Ribosomal protein S6 phosphorylation is controlled by TOR and modulated by PKA in *Candida albicans*. Mol Microbiol 98**:** 384-402.

Fonzi, W. A., and M. Y. Irwin, 1993 Isogenic strain construction and gene mapping in *Candida albicans*. Genetics 134**:** 717-728.

Maestrone, G., and R. Semar, 1968 Establishment and treatment of cutaneous *Candida albicans* infection in the rabbit. Naturwissenschaften 55**:** 87-88.

Noble, S. M., S. French, L. A. Kohn, V. Chen and A. D. Johnson, 2010 Systematic screens of a *Candida albicans* homozygous deletion library decouple morphogenetic switching and pathogenicity. Nat Genet 42**:** 590-598.

Noble, S. M., and A. D. Johnson, 2005 Strains and strategies for large-scale gene deletion studies of the diploid human fungal pathogen *Candida albicans*. Eukaryot Cell 4**:** 298-309.

Stichternoth, C., A. Fraund, E. Setiadi, L. Giasson, A. Vecchiarelli *et al.*, 2011 Sch9 kinase integrates hypoxia and CO2 sensing to suppress hyphal morphogenesis in *Candida albicans*. Eukaryot Cell 10**:** 502-511.

Vandeputte, P., S. Pradervand, F. Ischer, A. T. Coste, S. Ferrari *et al.*, 2012 Identification and functional characterization of Rca1, a transcription factor involved in both antifungal susceptibility and host response in *Candida albicans*. Eukaryot Cell 11**:** 916-931.
